# Supplementary material
Source: PubMed Central journal article supplement (PMC7756995)
Supplement: advancesADV2020002584-suppl1.pdf [file advancesADV2020002584-suppl1.pdf]

## Supplemental Information

Constitutive activation of Lyn kinase enhances BCR-responsiveness but not the development of CLL in *E $\mu$ -TCL1* mice

Viktorija Kohlhas, Michael Hallek,\* and Phuong-Hien Nguyen\*

*\* joint last and corresponding authors*

## Supplemental materials

**Table S1: List of fluorochrome labelled antibodies used for flow cytometry experiments.**

| <b>Antibody</b> | <b>Manufacturer</b> | <b>Clone</b>            |
|-----------------|---------------------|-------------------------|
| BrdU-PE         | BioLegend           | 3D4                     |
| CD3e-APC        | Miltenyi Biotec     | 17A2                    |
| CD5-PE/Vio770   | Miltenyi Biotec     | 53-7.3                  |
| CD11b-PE        | BioLegend           | M1/70                   |
| CD19-VioBlue    | Miltenyi Biotec     | 6D5                     |
| CD45-VioGreen   | Miltenyi Biotec     | 30F11                   |
| Ki67-APC        | Miltenyi Biotec     | Catalog no: 130-100-332 |

**Table S2: List of primary and secondary antibodies used in Western Blot analyses.**

| <b>Antibody</b>          | <b>Manufacturer</b> | <b>Clone</b>          |
|--------------------------|---------------------|-----------------------|
| GAPDH                    | Cell Signaling      | D16H11                |
| phospho-SHIP1 (Y1020)    | Cell Signaling      | Catalog no.:3941      |
| phospho-SYK (Y525/526)   | Cell Signaling      | C87C1                 |
| phosphotyrosine          | Merck               | 4G10                  |
| IRDye® 680LT anti-mouse  | LI-COR              | Catalog no. 925-68020 |
| IRDye® 680LT anti-rabbit | LI-COR              | Catalog no: 926-68023 |
| anti-rabbit-HRP          | Cell Signaling      | Catalog no: 7074      |

**Table S3: Antibody used for immunohistochemistry staining.**

| <b>Antibody</b>   | <b>Manufacturer</b> | <b>Clone</b>     |
|-------------------|---------------------|------------------|
| Cleaved Caspase 3 | Cell Signaling      | Catalog no: 9661 |

## Supplemental data

**Table S4: Log Fold Changes (LFCs) of phosphorylated peptides upon IgM stimulation in WT and Lyn<sup>up-B</sup> B cells.** Values represent the mean of 3 mice per genotype. Related to Figure 1D and S1B.

| Peptide name                  | WT     | Lyn <sup>up-B</sup> |
|-------------------------------|--------|---------------------|
| EGFR_862_874                  | 4.290  | 4.690               |
| FABPH_13_25                   | 2.344  | 4.687               |
| VGFR1_1046_1058_Y1048F        | 1.259  | 5.377               |
| ERBB4_1277_1289               | 2.509  | 3.530               |
| JAK2_1001_1013                | 0.770  | 4.823               |
| EGFR_1165_1177                | 2.682  | 2.862               |
| CALM_93_105                   | 1.771  | 2.496               |
| VGFR1_1235_1247               | 0.833  | 1.695               |
| EPOR_419_431                  | -0.454 | 2.732               |
| VGFR1_1162_1174               | 1.029  | 1.111               |
| TNNT1_2_14                    | 1.077  | 0.919               |
| ERBB4_1181_1193               | 0.818  | 1.050               |
| VGFR1_1320_1332_C1320K/C1321K | -0.639 | 2.498               |
| INSR_992_1004                 | 0.729  | 1.083               |
| GAB2_638_648                  | 0.605  | 0.911               |
| ERBB2_870_882                 | 0.711  | 0.779               |
| C1R_199_211                   | 0.514  | 0.919               |
| FGFR3_641_653                 | 0.811  | 0.619               |
| LAT_194_206                   | 0.637  | 0.707               |
| INSR_1348_1360                | -0.124 | 1.412               |
| PGFRB_1014_1028               | 0.396  | 0.825               |
| FYN_525_537                   | 0.091  | 1.088               |
| CBL_693_705                   | 0.518  | 0.597               |
| FGFR2_762_774                 | 0.351  | 0.754               |
| ANXA1_14_26                   | 0.380  | 0.669               |
| EGFR_1190_1202                | 0.356  | 0.669               |
| ERBB3_1283_1295               | 0.282  | 0.668               |
| FGFR3_753_765                 | 0.229  | 0.718               |
| FAK2_572_584                  | 0.191  | 0.755               |
| MBP_259_271                   | 0.093  | 0.845               |
| PRGR_545_557                  | -0.481 | 1.413               |
| B3AT_39_51                    | 0.481  | 0.370               |
| LAT_249_261                   | 0.405  | 0.444               |
| LCK_387_399                   | 0.147  | 0.691               |
| LYN_391_403                   | 0.116  | 0.691               |
| ERBB2_1241_1253               | 0.053  | 0.752               |
| GAB1_622_632                  | 0.136  | 0.630               |
| EPHA1_774_786                 | 0.230  | 0.471               |
| MK14_173_185                  | 0.153  | 0.530               |
| FGFR1_761_773                 | 0.010  | 0.627               |
| EPHA2_765_777                 | 0.111  | 0.470               |
| AKT1_320_332                  | 0.082  | 0.444               |
| AKT1_309_321_C310S            | 0.165  | 0.328               |
| JAK1_1027_1039                | 0.045  | 0.446               |
| PLCG1_1246_1258               | 0.243  | 0.208               |
| LYN_501_512                   | -0.002 | 0.448               |
| CD28_185_197                  | 0.058  | 0.373               |
| YES_420_432                   | -0.041 | 0.456               |
| IRS1_890_902                  | -0.002 | 0.414               |
| TYK2_1048_1060                | -0.042 | 0.415               |
| CRK_214_226                   | -0.139 | 0.501               |
| VGFR1_1049_1061               | -0.797 | 1.115               |
| KSYK_518_530                  | -0.119 | 0.427               |
| STAT3_698_710                 | 0.203  | 0.090               |
| TEC_512_524                   | -0.034 | 0.322               |
| CALM_95_107                   | 0.049  | 0.238               |
| EPHA7_607_619                 | -0.076 | 0.312               |
| MK07_212_224                  | -0.288 | 0.456               |
| MET_1228_1240                 | -0.234 | 0.381               |
| JAK3_974_986                  | -0.204 | 0.350               |
| P85A_600_612                  | -0.196 | 0.335               |
| MET_1227_1239                 | -0.174 | 0.282               |
| PP2AB_297_309                 | -0.274 | 0.375               |
| MK12_178_190                  | -0.168 | 0.267               |
| PGFRB_572_584                 | -0.128 | 0.218               |
| PDPK1_369_381                 | -0.160 | 0.230               |

|                        |        |        |
|------------------------|--------|--------|
| SRC_524_536            | -0.025 | 0.095  |
| EPHA4_589_601          | -0.085 | 0.151  |
| EPHB1_771_783          | -0.174 | 0.214  |
| ZBT16_621_633          | -0.235 | 0.264  |
| VGFR2_1168_1180        | -0.155 | 0.161  |
| VGFR1_1206_1218        | -0.253 | 0.256  |
| TYRO3_679_691          | -0.286 | 0.273  |
| PAXI_24_36             | -0.333 | 0.301  |
| IRS2_626_638           | -0.188 | 0.143  |
| PGFRB_768_780          | -0.193 | 0.142  |
| PTN11_539_551          | -0.389 | 0.271  |
| RBL2_99_111            | -0.368 | 0.237  |
| MK01_180_192           | -0.359 | 0.225  |
| MUSK_548_560           | -0.237 | 0.082  |
| VGFR3_1061_1073        | -0.254 | 0.091  |
| ZAP70_485_497          | -0.404 | 0.218  |
| PTN11_541_551          | -0.375 | 0.147  |
| PAXI_111_123           | -0.372 | 0.139  |
| PTN11_57_67            | -0.403 | 0.165  |
| MK14_177_187           | -0.453 | 0.203  |
| JAK2_563_577           | -0.294 | 0.018  |
| VGFR2_944_956          | -0.295 | 0.008  |
| CD3E_182_194           | -0.395 | 0.084  |
| ZAP70_313_325          | -0.302 | -0.012 |
| MAPK3_198_210_C203S    | -0.352 | 0.021  |
| PLCG1_764_776          | -0.304 | -0.030 |
| NCF1_313_325           | -0.282 | -0.053 |
| PDPK1_2_14             | -0.376 | 0.041  |
| ACHD_383_395           | -0.386 | 0.048  |
| NTRK2_696_708          | -0.356 | 0.005  |
| PGFRB_771_783          | -0.317 | -0.035 |
| FRK_380_392            | -0.428 | 0.070  |
| RON_1346_1358          | -0.347 | -0.036 |
| EPHB1_921_933          | -0.606 | 0.221  |
| RET_1022_1034          | -0.460 | 0.072  |
| ART_004_EAIYAAPFAKKKXC | -0.273 | -0.125 |
| FAK1_569_581           | -0.428 | 0.025  |
| EPHB4_583_595          | -0.526 | 0.095  |
| PRRX2_202_214          | -0.468 | 0.037  |
| CD70_9_21_C17S         | -0.398 | -0.042 |
| PGFRB_1002_1014        | -0.438 | -0.016 |
| VINC_815_827           | -0.551 | 0.081  |
| VGFR2_1046_1058        | -0.396 | -0.082 |
| PLCG2_1191_1203_C1200S | -0.413 | -0.069 |
| VGFR2_989_1001         | -0.420 | -0.077 |
| CTNB1_79_91            | -0.554 | 0.055  |
| FER_707_719            | -0.475 | -0.024 |
| GSK3B_210_222_C218S    | -0.388 | -0.115 |
| MK03_199_208           | -0.384 | -0.130 |
| ARAF_297_307           | -0.377 | -0.141 |
| CDK7_157_169           | -0.425 | -0.104 |
| RB_804_816             | -0.600 | 0.072  |
| EPOR_361_373           | -0.486 | -0.045 |
| DCX_67_79              | -0.526 | -0.009 |
| MK12_180_189_M182B     | -0.513 | -0.041 |
| MBP_198_210            | -0.455 | -0.107 |
| K2C6B_53_65            | -0.445 | -0.123 |
| RAF1_332_344           | -0.585 | 0.006  |
| DYR1A_312_324          | -0.459 | -0.131 |
| PGFRB_709_721          | -0.420 | -0.172 |
| ODBA_340_352_D340K     | -1.700 | 1.105  |
| VGFR1_1040_1052        | -0.668 | 0.057  |
| MK08_181_191           | -0.469 | -0.149 |
| 41_654_666             | -0.554 | -0.094 |
| EGFR_1103_1115         | -0.470 | -0.197 |
| FES_706_718            | -0.623 | -0.065 |
| MK10_216_228           | -0.558 | -0.161 |
| CD28_203_215           | -0.540 | -0.181 |
| PTN6_558_570           | -0.538 | -0.186 |
| CD3Z_116_128           | -0.491 | -0.250 |
| EFS_246_258            | -0.554 | -0.187 |
| PRGR_786_798           | -0.620 | -0.127 |
| CD3Z_135_147           | -0.635 | -0.171 |



|                           |        |        |
|---------------------------|--------|--------|
| BTLA_252_262              | -0.487 | -0.341 |
| ODPAT_291_303             | -1.914 | 1.072  |
| CD3E_193_205              | -0.592 | -0.256 |
| PECA1_706_718             | -0.693 | -0.166 |
| CD3Z_117_129              | -0.684 | -0.182 |
| TIE2_986_998              | -0.684 | -0.191 |
| PLCG1_777_789             | -0.735 | -0.157 |
| ENOG_37_49                | -0.662 | -0.287 |
| MPZL1_236_246             | -0.600 | -0.356 |
| CDK2_8_20                 | -0.728 | -0.235 |
| K2C8_425_437              | -0.582 | -0.382 |
| PTN11_580_590             | -0.607 | -0.365 |
| CD3Z_146_158              | -0.697 | -0.283 |
| CD3Z_105_117              | -0.822 | -0.162 |
| RASA1_453_465             | -0.802 | -0.188 |
| PECA1_708_718             | -0.707 | -0.300 |
| HAVR2_257_267             | -0.693 | -0.336 |
| CD3Z_77_89                | -0.698 | -0.341 |
| KIT_930_942_C942S         | -0.749 | -0.298 |
| PTN6_531_541              | -0.840 | -0.234 |
| CDK1_9_21                 | -0.841 | -0.244 |
| DYR1A_212_224             | -2.135 | 0.985  |
| PDCD1_221_229_FS219_220KK | -0.822 | -0.358 |
| STAT4_714_726             | -0.819 | -0.433 |
| CDK4_11_23                | -1.003 | -0.468 |
| ANXA2_17_29               | -1.023 | -0.638 |
| EGFR_1118_1130            | -3.444 | 1.298  |
| EGFR_908_920              | -3.810 | -0.649 |

**Table S5: LFCs of dephosphorylation of peptide substrates upon IgM stimulation in WT and *Lyn*<sup>up-B</sup> B cells. Values represent the mean of 2 mice per genotype. Related to Figure 1E.**

| Peptide no | WT     | <i>Lyn</i> <sup>up-B</sup> |
|------------|--------|----------------------------|
| 1          | 0.168  | 0.011                      |
| 2          | 0.094  | -0.161                     |
| 3          | 0.263  | -0.093                     |
| 4          | 0.323  | -0.116                     |
| 5          | 0.205  | -0.060                     |
| 6          | 0.123  | -0.359                     |
| 7          | 0.519  | -0.457                     |
| 8          | 0.341  | -0.070                     |
| 9          | 0.199  | -0.107                     |
| 10         | 0.060  | -0.021                     |
| 11         | 0.557  | 0.095                      |
| 12         | 0.087  | -0.147                     |
| 13         | 0.155  | 0.047                      |
| 14         | 0.363  | 0.076                      |
| 15         | 0.379  | 0.035                      |
| 16         | 0.212  | -0.262                     |
| 17         | 0.082  | -0.041                     |
| 18         | 0.134  | -0.144                     |
| 19         | 0.449  | -0.247                     |
| 20         | 0.467  | -0.113                     |
| 21         | 0.091  | -0.037                     |
| 22         | 0.359  | -0.311                     |
| 23         | 0.533  | -0.294                     |
| 24         | 0.349  | -0.344                     |
| 25         | -0.563 | -0.054                     |
| 26         | 0.384  | -0.203                     |
| 27         | 0.508  | -0.154                     |
| 28         | 0.114  | 0.000                      |
| 29         | 0.270  | -0.101                     |
| 30         | 0.343  | -0.140                     |
| 31         | 0.128  | -0.219                     |
| 32         | 0.349  | 0.025                      |
| 33         | -0.037 | -0.568                     |
| 34         | 0.247  | -0.046                     |
| 35         | 0.357  | -0.511                     |
| 36         | 0.186  | -0.128                     |
| 37         | 0.199  | -0.072                     |
| 38         | 0.256  | -0.025                     |

|     |        |        |
|-----|--------|--------|
| 39  | 0.345  | -0.188 |
| 40  | 0.044  | -0.250 |
| 41  | 0.000  | -0.186 |
| 42  | 0.495  | -0.009 |
| 43  | 0.095  | -0.215 |
| 44  | 0.089  | -0.183 |
| 45  | 0.244  | -0.086 |
| 46  | 0.570  | 0.120  |
| 47  | 0.189  | -0.103 |
| 48  | 0.486  | -0.046 |
| 49  | 0.321  | -0.050 |
| 50  | 0.264  | -0.164 |
| 51  | 0.260  | -1.006 |
| 52  | 0.377  | -0.143 |
| 53  | 0.417  | 0.024  |
| 54  | 0.301  | -0.013 |
| 55  | -0.143 | -0.217 |
| 56  | 0.041  | -0.138 |
| 57  | 0.121  | -0.211 |
| 58  | 0.240  | -0.467 |
| 59  | 0.161  | -0.129 |
| 60  | -0.069 | -0.243 |
| 61  | 0.034  | -0.157 |
| 62  | 0.453  | -0.285 |
| 63  | 0.114  | -0.180 |
| 64  | 0.253  | 0.029  |
| 65  | 0.434  | 0.071  |
| 66  | 0.407  | -0.112 |
| 67  | -0.090 | -0.181 |
| 68  | 0.079  | -0.179 |
| 69  | 0.191  | -0.362 |
| 70  | 0.452  | 0.047  |
| 71  | 0.431  | 0.037  |
| 72  | 0.275  | -0.113 |
| 73  | 0.363  | -0.520 |
| 74  | 0.119  | -0.603 |
| 75  | 0.040  | -0.182 |
| 76  | 0.208  | -0.051 |
| 77  | 0.020  | -0.238 |
| 78  | 0.115  | -0.053 |
| 79  | 0.200  | -0.420 |
| 80  | 0.236  | -0.151 |
| 81  | -0.087 | -0.252 |
| 82  | 0.353  | -0.035 |
| 83  | 0.022  | -0.252 |
| 84  | 0.069  | -0.086 |
| 85  | 0.191  | -0.127 |
| 86  | 0.155  | -0.123 |
| 87  | 0.217  | -0.086 |
| 88  | -0.096 | -0.289 |
| 89  | 0.064  | -0.160 |
| 90  | 0.161  | -0.149 |
| 91  | 0.135  | -0.038 |
| 92  | 0.297  | -0.128 |
| 93  | 0.097  | -0.148 |
| 94  | -0.242 | -0.407 |
| 95  | -0.033 | 0.044  |
| 96  | -0.068 | -0.206 |
| 97  | -0.166 | -0.167 |
| 98  | -0.037 | -0.165 |
| 99  | -0.038 | -0.064 |
| 100 | -0.087 | -0.127 |
| 101 | 0.147  | -0.091 |
| 102 | 0.274  | -0.040 |
| 103 | 0.111  | -0.114 |
| 104 | 0.237  | 0.210  |
| 105 | 0.178  | -0.373 |
| 106 | -0.190 | -0.192 |
| 107 | 0.308  | 0.029  |
| 108 | -0.050 | 0.001  |
| 109 | 0.215  | -0.470 |
| 110 | 0.473  | -0.136 |
| 111 | 0.205  | -0.012 |

|     |        |        |
|-----|--------|--------|
| 112 | 0.134  | -0.181 |
| 113 | 0.594  | -0.137 |
| 114 | 0.416  | 0.190  |
| 115 | 0.498  | -0.254 |
| 116 | 0.312  | 0.018  |
| 117 | 0.273  | -0.018 |
| 118 | 0.251  | 0.129  |
| 119 | 0.251  | 0.041  |
| 120 | 0.071  | -0.171 |
| 121 | 0.147  | -0.377 |
| 122 | -0.075 | 0.149  |
| 123 | -0.119 | -0.160 |
| 124 | 0.046  | -0.249 |
| 125 | 0.182  | -0.543 |
| 126 | -0.016 | -0.235 |
| 127 | -0.017 | -0.166 |
| 128 | -0.184 | -0.266 |
| 129 | -0.007 | -0.343 |
| 130 | 0.135  | -0.066 |
| 131 | 0.139  | -0.044 |
| 132 | 0.309  | -0.161 |
| 133 | 0.391  | -0.240 |
| 134 | -0.020 | -0.295 |
| 135 | 0.098  | -0.119 |
| 136 | 0.326  | -0.237 |
| 137 | 0.155  | -0.712 |
| 138 | 0.089  | -0.173 |
| 139 | 0.071  | -0.373 |
| 140 | 0.039  | -0.052 |
| 141 | 0.376  | -0.395 |
| 142 | 0.249  | 0.029  |
| 143 | 0.000  | -0.297 |
| 144 | -0.198 | -0.160 |
| 145 | 0.310  | -0.106 |
| 146 | 0.364  | -0.376 |
| 147 | 0.091  | -0.295 |
| 148 | -0.168 | -0.053 |
| 149 | 0.031  | -0.519 |
| 150 | 0.164  | -0.497 |
| 151 | -0.019 | -0.231 |
| 152 | -0.042 | -0.271 |
| 153 | -0.208 | -0.091 |
| 154 | -0.084 | 0.605  |
| 155 | 0.391  | -1.186 |
| 156 | 0.342  | -0.206 |
| 157 | 0.134  | -0.190 |
| 158 | 0.088  | -0.269 |
| 159 | 0.351  | -0.045 |
| 160 | 0.207  | -0.608 |
| 161 | 0.420  | -0.296 |
| 162 | 0.276  | -0.160 |
| 163 | 0.223  | -0.210 |
| 164 | 0.306  | -0.187 |
| 165 | 0.194  | 0.200  |
| 166 | 0.030  | -0.045 |
| 167 | -0.017 | -0.054 |
| 168 | 0.108  | -0.315 |
| 169 | -0.005 | -0.092 |
| 170 | 0.424  | -0.233 |
| 171 | 0.093  | -0.555 |
| 172 | 0.455  | -0.199 |
| 173 | 0.460  | -0.209 |

**Table S6: LFCs of phosphorylated peptides upon IgM stimulation in WT and Lyn<sup>up-B</sup> B cells.** Values represent the mean of 3 mice per genotype. Related to Figure 4F and S1C.

| Peptide name           | <i>TCL1</i> <sup>tg/wt</sup> | <i>TCL1</i> <sup>tg/wt</sup> Lyn <sup>up-B</sup> |
|------------------------|------------------------------|--------------------------------------------------|
| FGFR3_641_653          | 2.148                        | 1.132                                            |
| ODPAT_291_303          | 1.397                        | 0.886                                            |
| VGFR1_1046_1058_Y1048F | 0.007                        | 1.546                                            |
| EGFR_862_874           | 0.338                        | 1.017                                            |
| CALM_93_105            | 0.188                        | 1.018                                            |

|                    |        |        |
|--------------------|--------|--------|
| EGFR_1165_1177     | -0.015 | 1.094  |
| INSR_1348_1360     | 1.504  | -0.439 |
| ERBB4_1277_1289    | -0.046 | 0.884  |
| ODBA_340_352_D340K | 0.146  | 0.690  |
| B3AT_39_51         | 0.178  | 0.635  |
| FABPH_13_25        | -0.335 | 1.140  |
| INSR_992_1004      | 0.101  | 0.689  |
| ERBB4_1181_1193    | 0.149  | 0.592  |
| CRK_214_226        | 0.222  | 0.465  |
| VGFR1_1235_1247    | 0.010  | 0.676  |
| VGFR1_1162_1174    | 0.058  | 0.625  |
| EGFR_1190_1202     | 0.132  | 0.548  |
| PLCG1_1246_1258    | 0.349  | 0.315  |
| MBP_259_271        | 0.139  | 0.460  |
| GAB2_638_648       | 0.055  | 0.527  |
| ERBB2_870_882      | 0.115  | 0.433  |
| LAT_194_206        | 0.103  | 0.430  |
| LYN_501_512        | 0.081  | 0.425  |
| TNNT1_2_14         | 0.230  | 0.268  |
| JAK2_1001_1013     | -0.236 | 0.732  |
| PGFRB_1014_1028    | 0.070  | 0.394  |
| MK14_173_185       | 0.072  | 0.387  |
| VGFR1_1049_1061    | -1.397 | 1.851  |
| C1R_199_211        | -0.169 | 0.617  |
| PP2AB_297_309      | -0.061 | 0.507  |
| ERBB3_1283_1295    | -0.058 | 0.466  |
| CBL_693_705        | 0.028  | 0.352  |
| TYK2_1048_1060     | 0.056  | 0.282  |
| FYN_525_537        | -0.122 | 0.447  |
| KSYK_518_530       | 0.038  | 0.273  |
| FGFR2_762_774      | 0.056  | 0.249  |
| LAT_249_261        | 0.001  | 0.283  |
| MK07_212_224       | -0.278 | 0.551  |
| FAK2_572_584       | -0.037 | 0.304  |
| LCK_387_399        | 0.022  | 0.243  |
| FGFR1_761_773      | 0.027  | 0.230  |
| EPHA2_765_777      | -0.004 | 0.258  |
| PRGR_545_557       | 0.152  | 0.100  |
| ANXA1_14_26        | -0.028 | 0.266  |
| PTN11_539_551      | -0.153 | 0.385  |
| VGFR1_1206_1218    | -0.226 | 0.439  |
| MET_1227_1239      | -0.066 | 0.271  |
| JAK1_1027_1039     | -0.133 | 0.330  |
| LYN_391_403        | -0.047 | 0.237  |
| MK01_180_192       | -0.276 | 0.463  |
| ERBB2_1241_1253    | -0.066 | 0.239  |
| EPHA1_774_786      | 0.001  | 0.160  |
| CD28_185_197       | -0.239 | 0.392  |
| PLCG1_777_789      | 0.198  | -0.070 |
| AKT1_309_321_C310S | -0.137 | 0.256  |
| NTRK2_696_708      | -0.141 | 0.259  |
| VGFR2_1046_1058    | -0.051 | 0.164  |
| FAK1_569_581       | 0.016  | 0.089  |
| FGFR3_753_765      | -0.060 | 0.163  |
| JAK2_563_577       | -0.023 | 0.122  |
| CALM_95_107        | -0.149 | 0.248  |
| PTN11_541_551      | -0.137 | 0.233  |
| SRC_524_536        | -0.094 | 0.191  |
| RBL2_99_111        | -0.184 | 0.280  |
| NCF1_313_325       | -0.142 | 0.222  |
| AKT1_320_332       | -0.061 | 0.139  |
| CD3Z_116_128       | -0.136 | 0.212  |
| IRS1_890_902       | -0.083 | 0.138  |
| ACHD_383_395       | -0.136 | 0.179  |
| PGFRB_768_780      | -0.220 | 0.257  |
| CTNB1_79_91        | -0.109 | 0.143  |
| MET_1228_1240      | -0.105 | 0.138  |
| JAK3_974_986       | -0.107 | 0.137  |
| PGFRB_572_584      | -0.093 | 0.123  |
| PDPK1_2_14         | -0.046 | 0.066  |
| PAXI_24_36         | -0.149 | 0.161  |
| TEC_512_524        | -0.156 | 0.163  |
| PAXI_111_123       | -0.100 | 0.106  |

|                           |        |        |
|---------------------------|--------|--------|
| VGFR2_1168_1180           | -0.115 | 0.111  |
| EGFR_1103_1115            | -0.133 | 0.127  |
| PGFRB_771_783             | -0.164 | 0.157  |
| YES_420_432               | -0.169 | 0.142  |
| EPOR_361_373              | -0.116 | 0.083  |
| EPHB1_771_783             | -0.184 | 0.144  |
| TYRO3_679_691             | -0.142 | 0.094  |
| CDK2_8_20                 | -0.048 | -0.017 |
| ART_004_EAIYAAPFAKKKXC    | -0.191 | 0.126  |
| EPHA7_607_619             | -0.206 | 0.138  |
| P85A_600_612              | -0.157 | 0.087  |
| MK12_178_190              | -0.224 | 0.153  |
| MUSK_548_560              | -0.198 | 0.119  |
| PRRX2_202_214             | -0.130 | 0.047  |
| MK12_180_189_M182B        | -0.239 | 0.151  |
| CD3Z_135_147              | -0.119 | 0.028  |
| MK14_177_187              | -0.192 | 0.090  |
| GSK3B_210_222_C218S       | -0.257 | 0.151  |
| PGFRB_709_721             | -0.266 | 0.159  |
| 41_654_666                | -0.089 | -0.020 |
| VGFR3_1061_1073           | -0.184 | 0.075  |
| MAPK3_198_210_C203S       | -0.244 | 0.134  |
| RET_1022_1034             | -0.159 | 0.046  |
| RON_1346_1358             | -0.239 | 0.116  |
| EPOR_419_431              | -0.370 | 0.246  |
| CD3E_182_194              | -0.148 | 0.024  |
| FER_707_719               | -0.094 | -0.034 |
| IRS2_626_638              | -0.121 | -0.008 |
| ARAF_297_307              | -0.147 | 0.008  |
| RAF1_332_344              | -0.158 | 0.006  |
| ZBT16_621_633             | -0.301 | 0.142  |
| ZAP70_485_497             | -0.220 | 0.056  |
| ZAP70_313_325             | -0.181 | 0.012  |
| EFS_246_258               | -0.115 | -0.056 |
| EPHB1_921_933             | -0.374 | 0.201  |
| PECA1_706_718             | -0.140 | -0.040 |
| FES_706_718               | -0.159 | -0.028 |
| VGFR2_944_956             | -0.275 | 0.087  |
| PDCD1_221_229_FS219_220KK | -0.259 | 0.065  |
| PLCG1_764_776             | -0.211 | -0.005 |
| EPHA4_589_601             | -0.160 | -0.057 |
| FRK_380_392               | -0.221 | -0.004 |
| PDPK1_369_381             | -0.197 | -0.030 |
| PLCG2_1191_1203_C1200S    | -0.195 | -0.039 |
| CD3Z_146_158              | -0.190 | -0.046 |
| MBP_198_210               | -0.274 | 0.036  |
| MK10_216_228              | -0.285 | 0.048  |
| PTN11_57_67               | -0.203 | -0.041 |
| CD3E_193_205              | -0.290 | 0.042  |
| CD3Z_117_129              | -0.133 | -0.120 |
| DYR1A_312_324             | -0.346 | 0.093  |
| PTN6_558_570              | -0.154 | -0.107 |
| EPHB4_583_595             | -0.511 | 0.248  |
| CD3Z_77_89                | -0.132 | -0.132 |
| VGFR1_1040_1052           | -0.303 | 0.034  |
| RASA1_453_465             | -0.252 | -0.034 |
| PGFRB_1002_1014           | -0.239 | -0.054 |
| VGFR2_989_1001            | -0.332 | 0.031  |
| DCX_67_79                 | -0.372 | 0.050  |
| KIT_930_942_C942S         | -0.213 | -0.114 |
| VINC_815_827              | -0.388 | 0.059  |
| CD3Z_105_117              | -0.213 | -0.137 |
| PTN11_580_590             | -0.271 | -0.086 |
| MK08_181_191              | -0.372 | -0.002 |
| MK03_199_208              | -0.432 | 0.044  |
| MPZL1_236_246             | -0.224 | -0.166 |
| TIE2_986_998              | -0.283 | -0.128 |
| RB_804_816                | -0.336 | -0.101 |
| PTN6_531_541              | -0.294 | -0.144 |
| HAVR2_257_267             | -0.321 | -0.119 |
| ENOG_37_49                | -0.299 | -0.143 |
| ANXA2_17_29               | -0.378 | -0.066 |
| K2C8_425_437              | -0.415 | -0.046 |

|                               |        |        |
|-------------------------------|--------|--------|
| K2C6B_53_65                   | -0.459 | -0.005 |
| PECA1_708_718                 | -0.236 | -0.239 |
| GAB1_622_632                  | 0.089  | -0.579 |
| CD28_203_215                  | -0.354 | -0.139 |
| CDK1_9_21                     | -0.343 | -0.153 |
| STAT4_714_726                 | -0.426 | -0.094 |
| PRGR_786_798                  | -0.477 | -0.066 |
| CDK7_157_169                  | -0.294 | -0.251 |
| BTLA_252_262                  | -0.364 | -0.188 |
| CDK4_11_23                    | -0.403 | -0.172 |
| CD70_9_21_C17S                | -0.507 | -0.097 |
| DYR1A_212_224                 | -1.254 | 0.143  |
| EGFR_1118_1130                | -1.180 | -0.369 |
| VGFR1_1320_1332_C1320K/C1321K | -0.647 | -1.302 |
| EGFR_908_920                  | -2.745 | -0.917 |
| STAT3_698_710                 | -2.987 | -0.882 |

**Table S7: LFCs of dephosphorylation of peptide substrates upon IgM stimulation in WT and Lyn<sup>up-B</sup> B cells.** Values represent the mean of 2 mice per genotype. Related to Figure 4G.

| Peptide no | <i>TCL1</i> <sup>tg/wt</sup> | <i>TCL1</i> <sup>tg/wt</sup> Lyn <sup>up-B</sup> |
|------------|------------------------------|--------------------------------------------------|
| 1          | 0.0148                       | -0.0064                                          |
| 2          | -0.0584                      | 0.0111                                           |
| 3          | 0.0182                       | -0.0255                                          |
| 4          | 0.0432                       | 0.0561                                           |
| 5          | 0.0340                       | 0.0384                                           |
| 6          | -0.0767                      | -0.0480                                          |
| 7          | 0.0779                       | 0.0363                                           |
| 8          | 0.0439                       | 0.0353                                           |
| 9          | 0.0267                       | 0.0204                                           |
| 10         | -0.0232                      | -0.0271                                          |
| 11         | 0.0902                       | 0.0544                                           |
| 12         | 0.0265                       | 0.0422                                           |
| 13         | 0.0429                       | 0.0311                                           |
| 14         | 0.0720                       | 0.0570                                           |
| 15         | 0.0412                       | 0.0517                                           |
| 16         | -0.1083                      | -0.0060                                          |
| 17         | -0.0797                      | -0.0208                                          |
| 18         | -0.0533                      | -0.0078                                          |
| 19         | -0.0236                      | 0.0231                                           |
| 20         | -0.0077                      | 0.0491                                           |
| 21         | -0.0043                      | -0.0260                                          |
| 22         | -0.0011                      | 0.0320                                           |
| 23         | 0.0326                       | 0.0379                                           |
| 24         | 0.0427                       | 0.0342                                           |
| 25         | -0.2573                      | -0.1315                                          |
| 26         | 0.0118                       | -0.0295                                          |
| 27         | 0.0755                       | 0.0540                                           |
| 28         | 0.0385                       | 0.0439                                           |
| 29         | -0.0544                      | -0.0473                                          |
| 30         | 0.0090                       | 0.0606                                           |
| 31         | 0.0283                       | 0.0492                                           |
| 32         | 0.0061                       | 0.0458                                           |
| 33         | -0.0545                      | -0.0104                                          |
| 34         | 0.0338                       | 0.0618                                           |
| 35         | -0.0090                      | 0.0328                                           |
| 36         | -0.0368                      | 0.0053                                           |
| 37         | 0.0087                       | 0.0760                                           |
| 38         | 0.0684                       | 0.0450                                           |
| 39         | 0.0521                       | 0.0358                                           |
| 40         | 0.0028                       | 0.0498                                           |
| 41         | 0.0003                       | 0.0467                                           |
| 42         | 0.0821                       | 0.0708                                           |
| 43         | 0.0047                       | 0.0432                                           |
| 44         | -0.0063                      | 0.0745                                           |
| 45         | 0.0229                       | 0.0736                                           |
| 46         | 0.0765                       | 0.1203                                           |
| 47         | 0.0340                       | -0.0108                                          |
| 48         | 0.0340                       | 0.0880                                           |
| 49         | -0.0775                      | -0.0192                                          |
| 50         | -0.0348                      | -0.0221                                          |
| 51         | -0.2498                      | -0.0039                                          |

|     |         |         |
|-----|---------|---------|
| 52  | 0.0062  | 0.0165  |
| 53  | 0.0548  | 0.0514  |
| 54  | 0.0309  | 0.0530  |
| 55  | -0.1407 | 0.0458  |
| 56  | 0.0412  | -0.0728 |
| 57  | -0.1416 | -0.0606 |
| 58  | -0.0939 | -0.0286 |
| 59  | -0.0072 | -0.0682 |
| 60  | -0.0679 | -0.1331 |
| 61  | -0.0564 | -0.0031 |
| 62  | -0.0043 | 0.0624  |
| 63  | -0.0167 | -0.0969 |
| 64  | 0.0235  | -0.0314 |
| 65  | 0.0277  | 0.1057  |
| 66  | 0.0009  | 0.0829  |
| 67  | -0.0562 | -0.0979 |
| 68  | -0.0892 | -0.0275 |
| 69  | -0.0046 | 0.0500  |
| 70  | 0.0167  | 0.0630  |
| 71  | -0.0633 | -0.0055 |
| 72  | -0.0035 | 0.0399  |
| 73  | -0.0524 | 0.0264  |
| 74  | -0.0181 | 0.0322  |
| 75  | -0.0983 | 0.0463  |
| 76  | 0.0449  | 0.0158  |
| 77  | -0.1586 | 0.0096  |
| 78  | 0.0372  | 0.0473  |
| 79  | 0.0024  | 0.0726  |
| 80  | 0.0153  | 0.0342  |
| 81  | 0.0143  | -0.0614 |
| 82  | -0.0283 | 0.0330  |
| 83  | -0.1321 | -0.1183 |
| 84  | -0.0886 | 0.0184  |
| 85  | -0.0409 | 0.0022  |
| 86  | -0.1216 | 0.0361  |
| 87  | -0.0651 | -0.0805 |
| 88  | -0.0994 | -0.0700 |
| 89  | -0.0493 | 0.0701  |
| 90  | -0.0416 | 0.0060  |
| 91  | 0.0536  | -0.0358 |
| 92  | -0.0515 | 0.0064  |
| 93  | -0.0296 | 0.0022  |
| 94  | -0.1247 | -0.0264 |
| 95  | -0.0193 | -0.0055 |
| 96  | -0.1171 | 0.0357  |
| 97  | -0.0787 | -0.1556 |
| 98  | -0.1006 | -0.0023 |
| 99  | -0.0363 | -0.1089 |
| 100 | -0.1674 | -0.0072 |
| 101 | -0.0450 | 0.0153  |
| 102 | 0.0512  | -0.0744 |
| 103 | -0.0567 | 0.0133  |
| 104 | 0.0343  | 0.0495  |
| 105 | -0.6895 | -0.3335 |
| 106 | -0.1721 | -0.0178 |
| 107 | -0.0602 | 0.0496  |
| 108 | -0.1109 | -0.0611 |
| 109 | -0.0287 | -0.0004 |
| 110 | 0.0571  | 0.0353  |
| 111 | 0.0358  | 0.0154  |
| 112 | -0.0340 | -0.0200 |
| 113 | -0.0034 | 0.0555  |
| 114 | -0.0390 | -0.0746 |
| 115 | -0.0944 | 0.0409  |
| 116 | -0.0323 | 0.0947  |
| 117 | 0.0527  | -0.0244 |
| 118 | 0.0487  | 0.0381  |
| 119 | 0.0636  | 0.0553  |
| 120 | -0.0583 | -0.0314 |
| 121 | -0.1779 | -0.0434 |
| 122 | 0.0206  | -0.0760 |
| 123 | -0.0841 | -0.0896 |
| 124 | -0.0035 | 0.0265  |

|     |         |         |
|-----|---------|---------|
| 125 | -0.2301 | -0.0062 |
| 126 | -0.0965 | -0.1214 |
| 127 | -0.0513 | 0.0204  |
| 128 | -0.1266 | -0.0627 |
| 129 | -0.0959 | -0.1243 |
| 130 | -0.0029 | -0.0637 |
| 131 | 0.0210  | 0.0184  |
| 132 | -0.0344 | -0.0001 |
| 133 | -0.0554 | 0.0205  |
| 134 | -0.0113 | -0.1038 |
| 135 | -0.0598 | 0.0337  |
| 136 | -0.0680 | -0.0018 |
| 137 | -0.0609 | 0.0076  |
| 138 | -0.0585 | -0.0779 |
| 139 | 0.0399  | -0.1024 |
| 140 | -0.0373 | -0.0214 |
| 141 | -0.0644 | 0.0262  |
| 142 | -0.0293 | 0.0001  |
| 143 | -0.1168 | -0.0663 |
| 144 | 0.0005  | -0.0592 |
| 145 | -0.0650 | 0.0326  |
| 146 | -0.0162 | 0.0321  |
| 147 | -0.0052 | -0.1919 |
| 148 | -0.0824 | -0.0713 |
| 149 | -0.1450 | -0.1347 |
| 150 | -0.0171 | 0.0943  |
| 151 | -0.1932 | -0.0608 |
| 152 | -0.1391 | -0.0232 |
| 153 | -0.1690 | -0.0799 |
| 154 | -0.7127 | -0.1771 |
| 155 | 0.0040  | -0.4042 |
| 156 | 0.0346  | 0.0281  |
| 157 | -0.0900 | -0.0152 |
| 158 | -0.0592 | -0.0543 |
| 159 | 0.0185  | 0.0487  |
| 160 | -0.0052 | 0.0322  |
| 161 | -0.0780 | 0.0258  |
| 162 | 0.0315  | 0.0403  |
| 163 | 0.0344  | 0.0300  |
| 164 | -0.1049 | -0.0588 |
| 165 | 0.0403  | 0.0088  |
| 166 | 0.0021  | 0.0169  |
| 167 | -0.0678 | -0.0593 |
| 168 | 0.0017  | 0.0315  |
| 169 | -0.0009 | -0.0287 |
| 170 | -0.0362 | 0.0301  |
| 171 | 0.0066  | 0.0268  |
| 172 | -0.0309 | 0.0342  |
| 173 | -0.0133 | 0.0077  |



Figure S1A

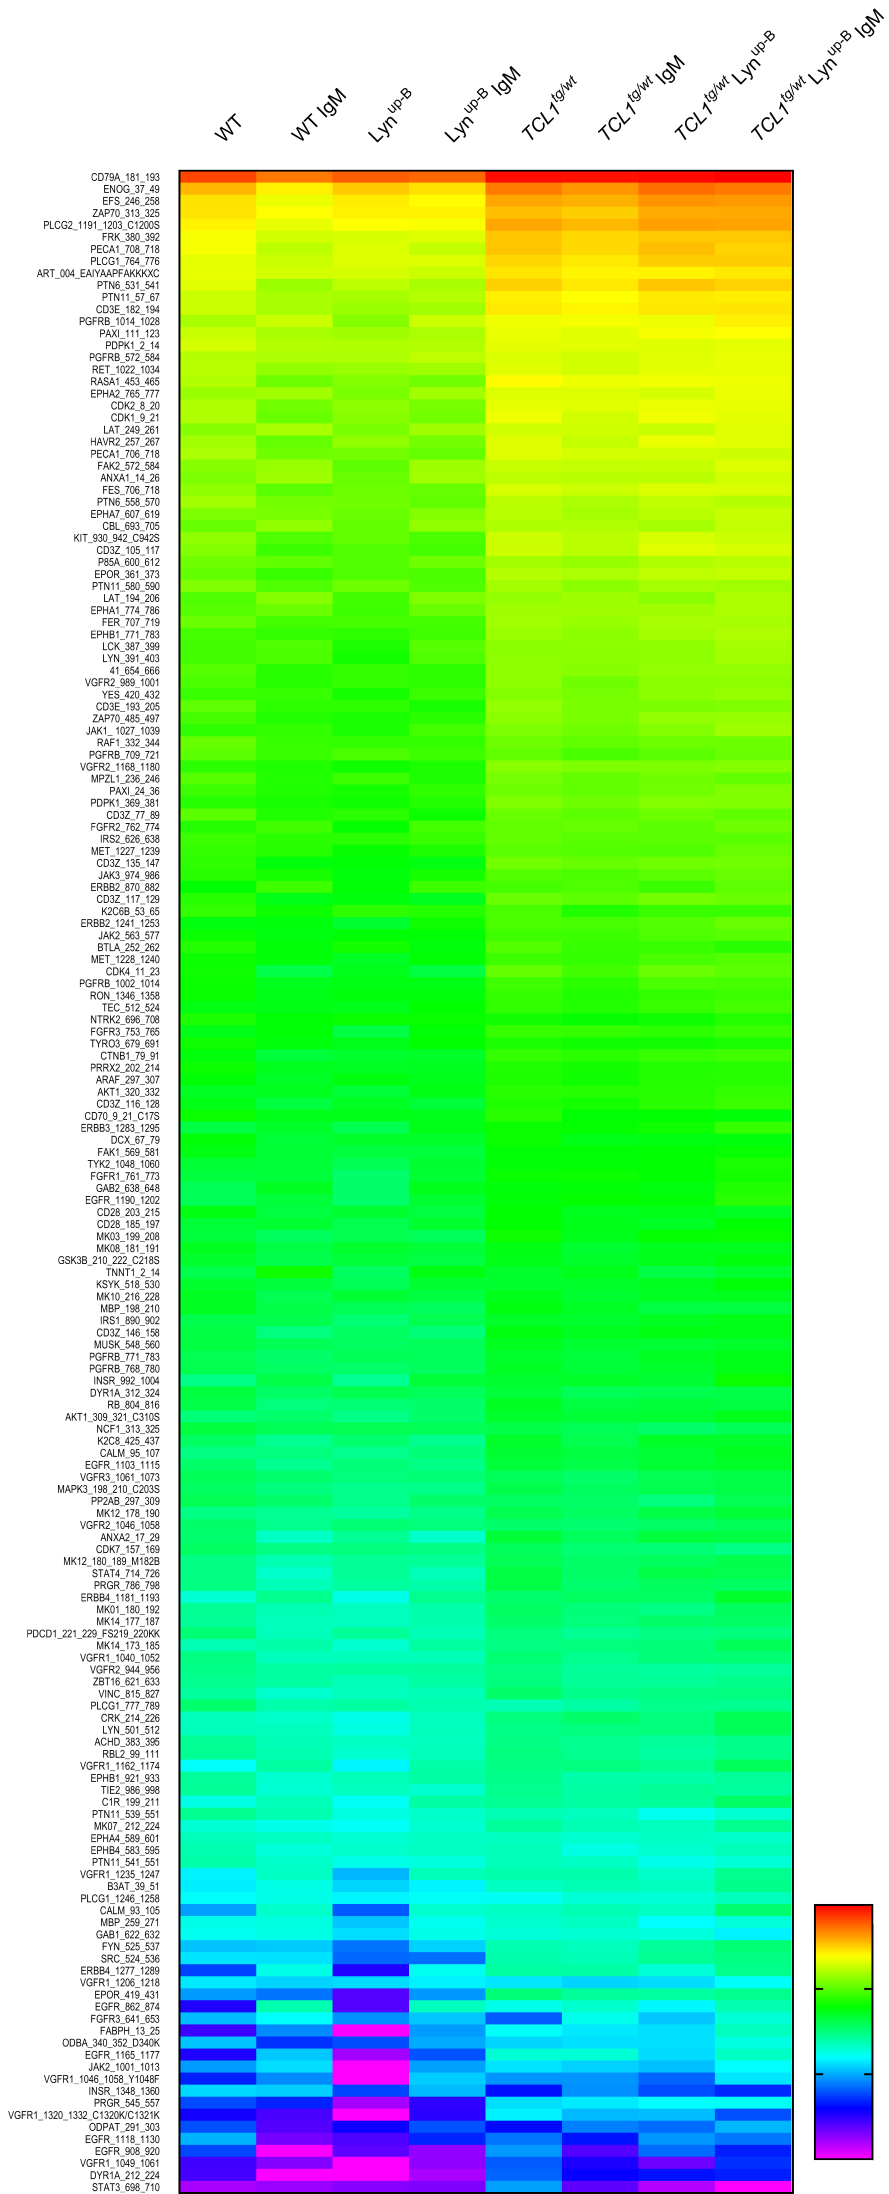

Figure S1B

Y Phosphorylation

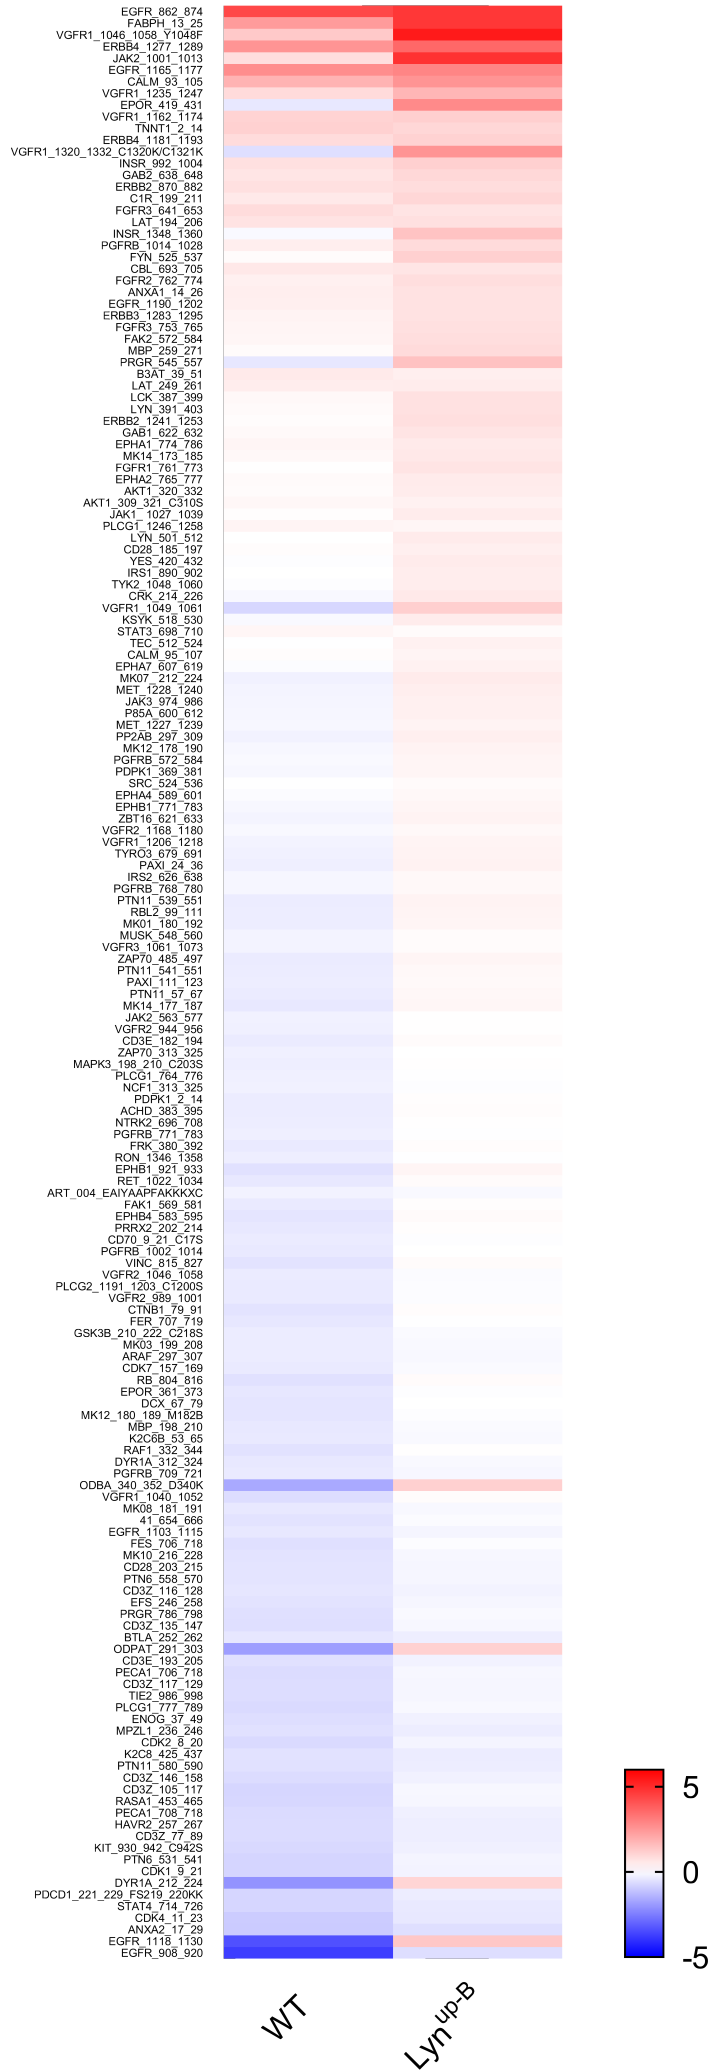

Figure S1C

Y Phosphorylation

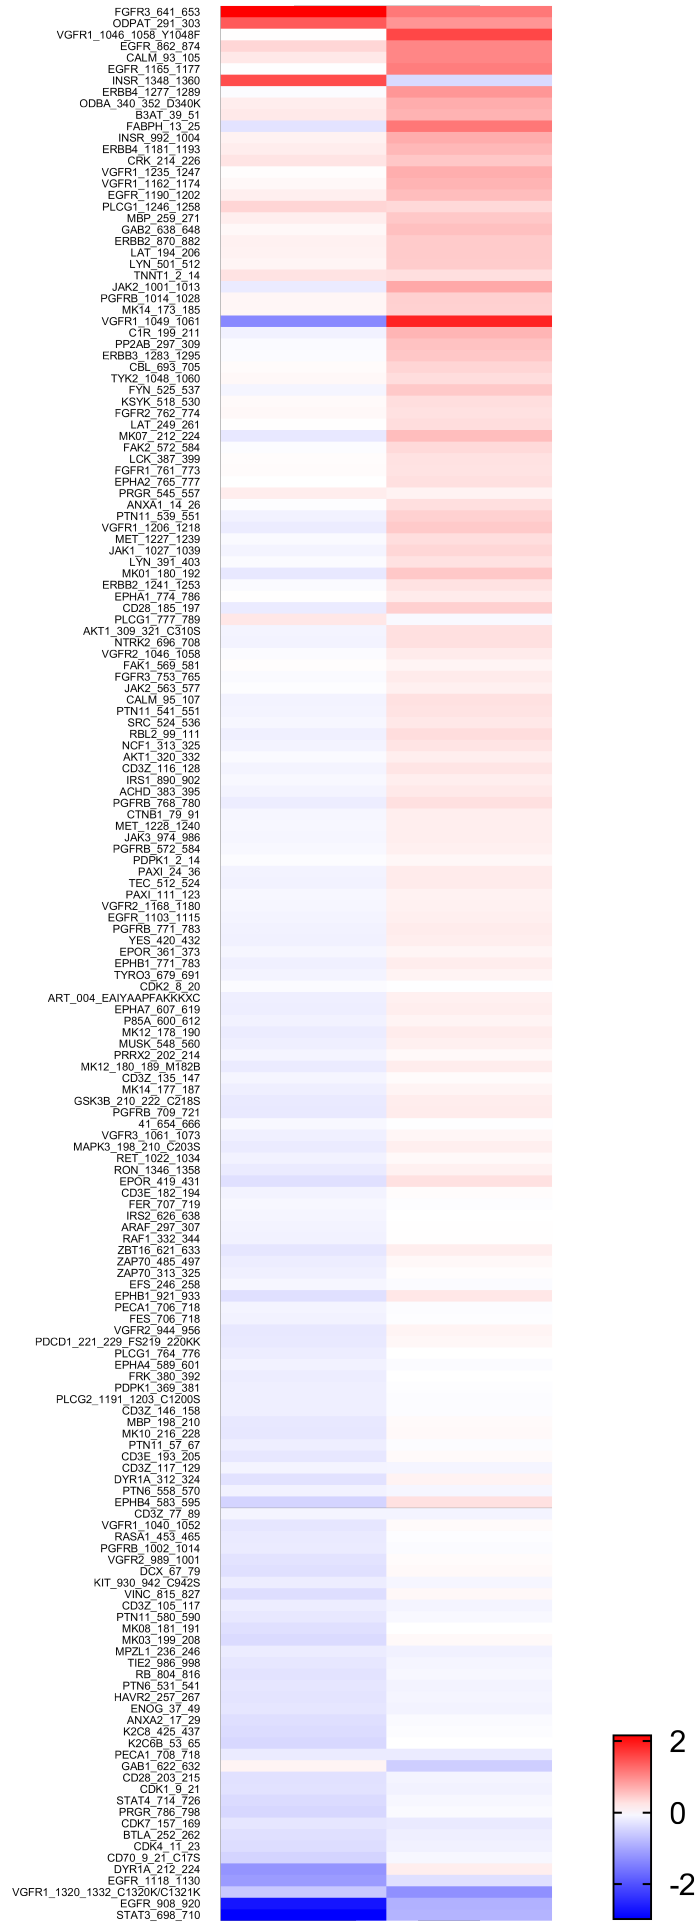

TCL 1tg/wt  
TCL 1tg/wt Lyn up-B

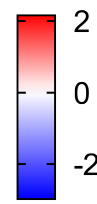

**Figure S1D**

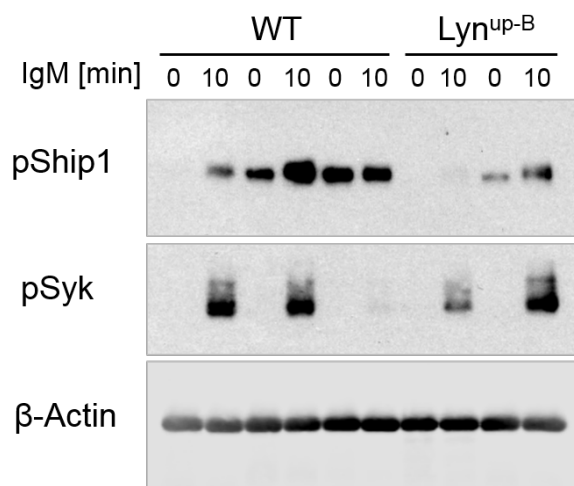

Figure S2

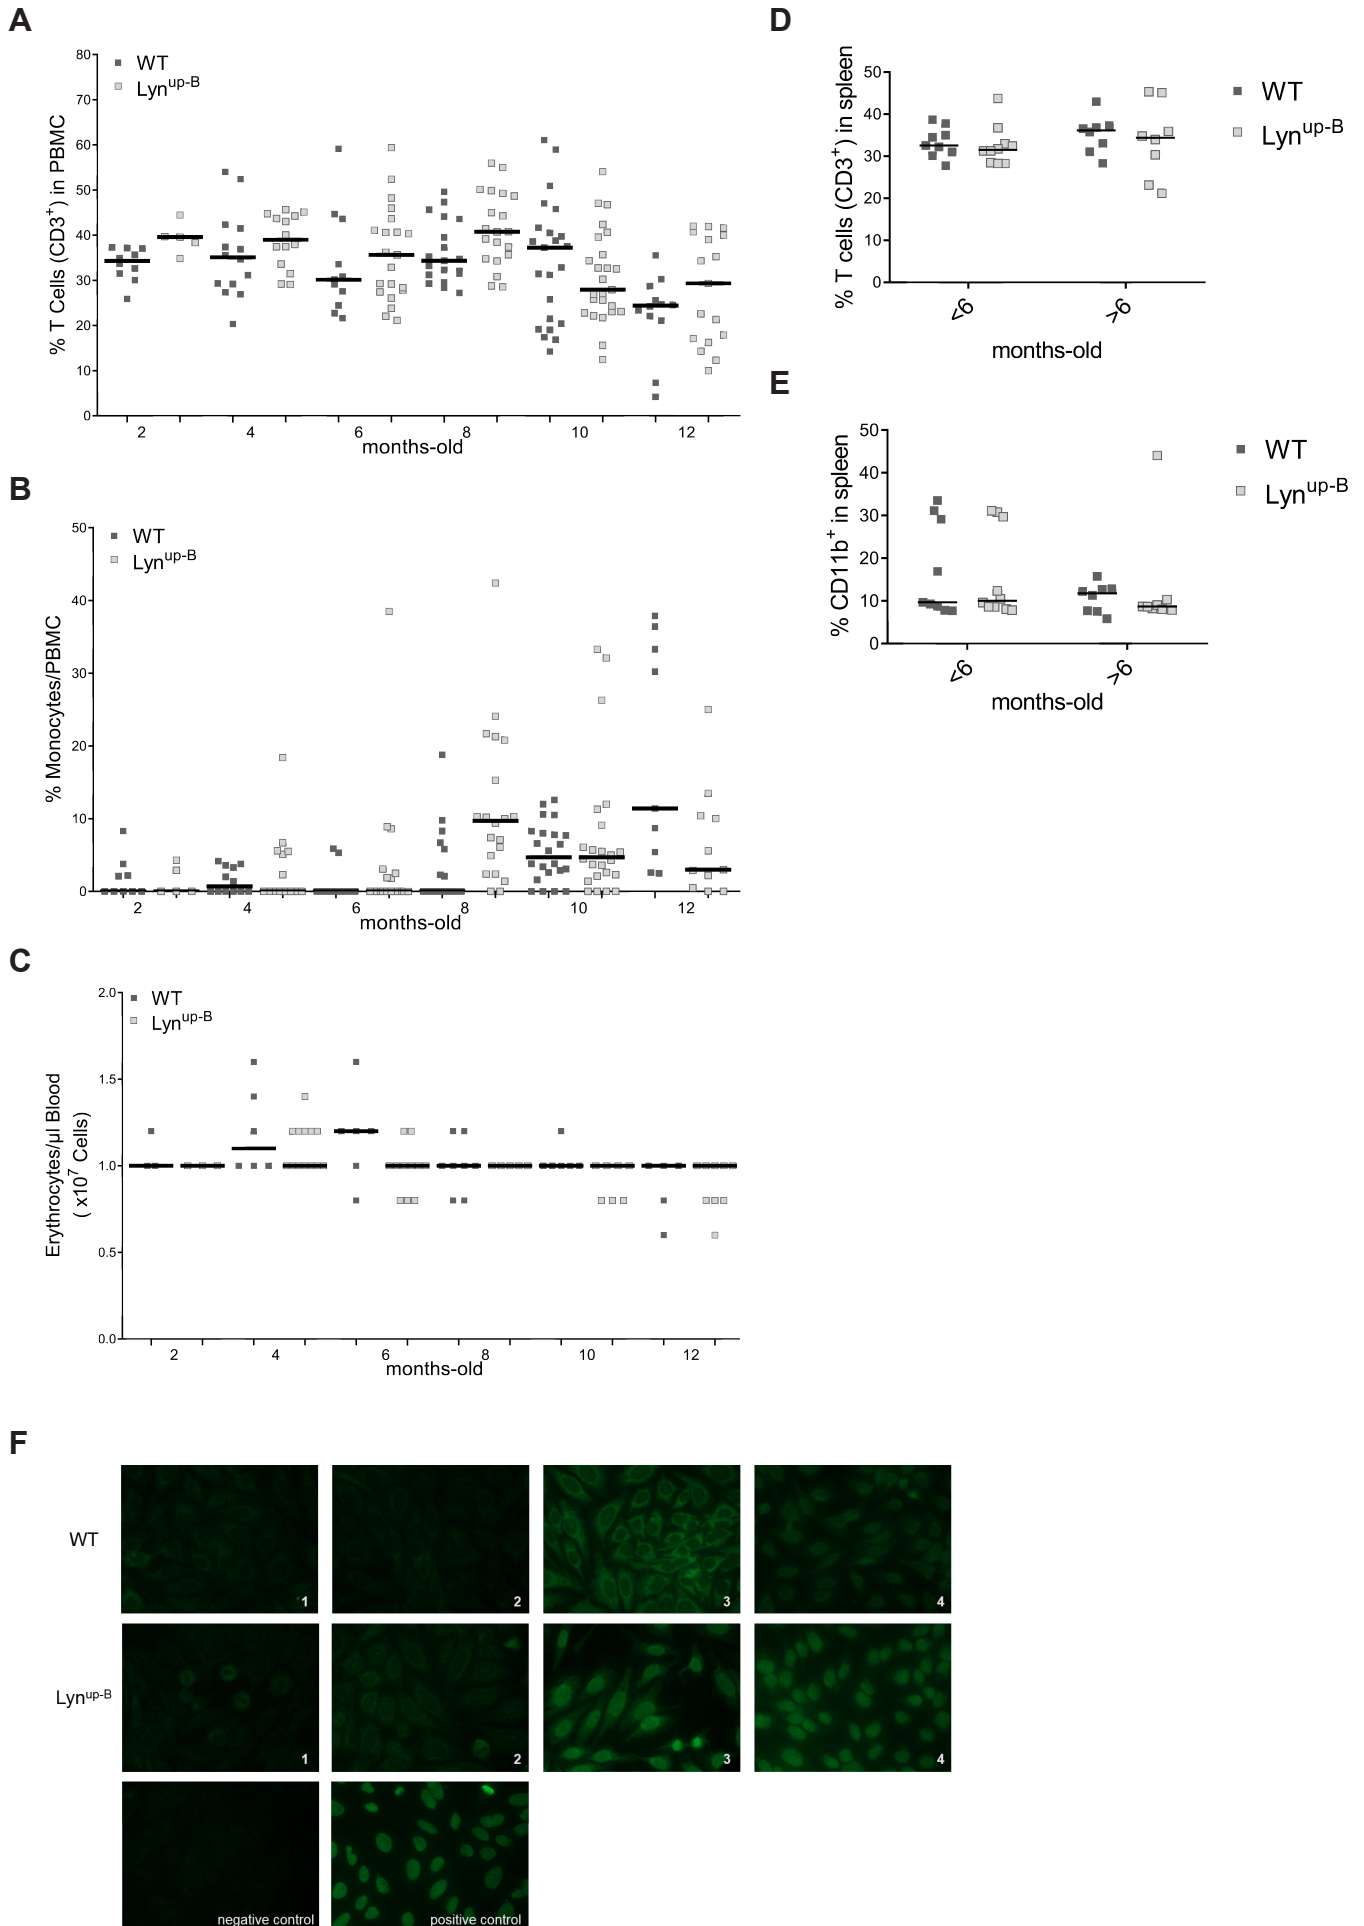

**Figure S3**

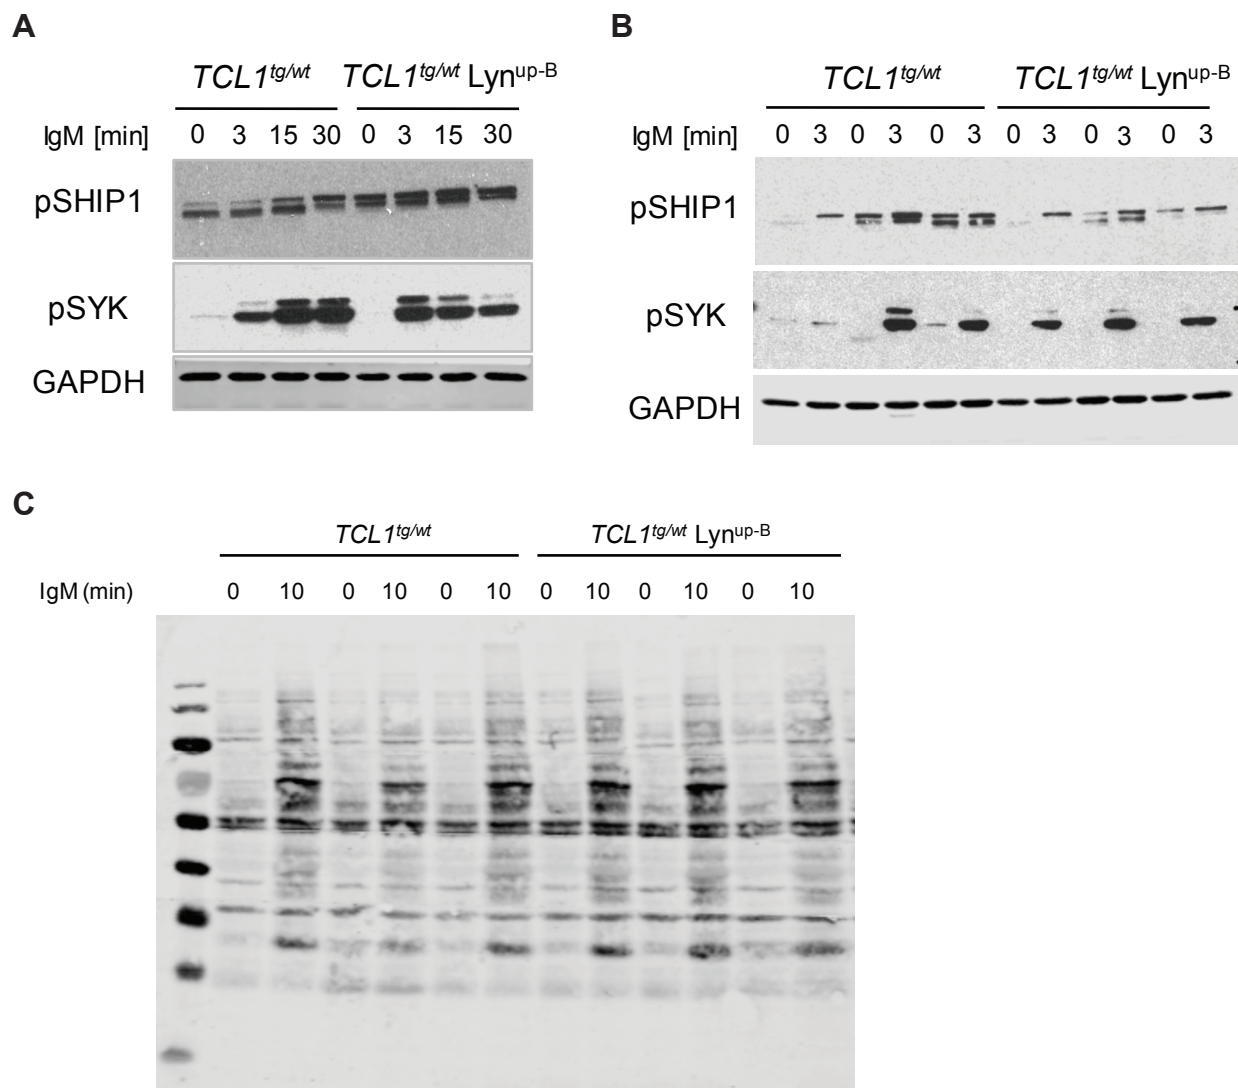

Figure S4

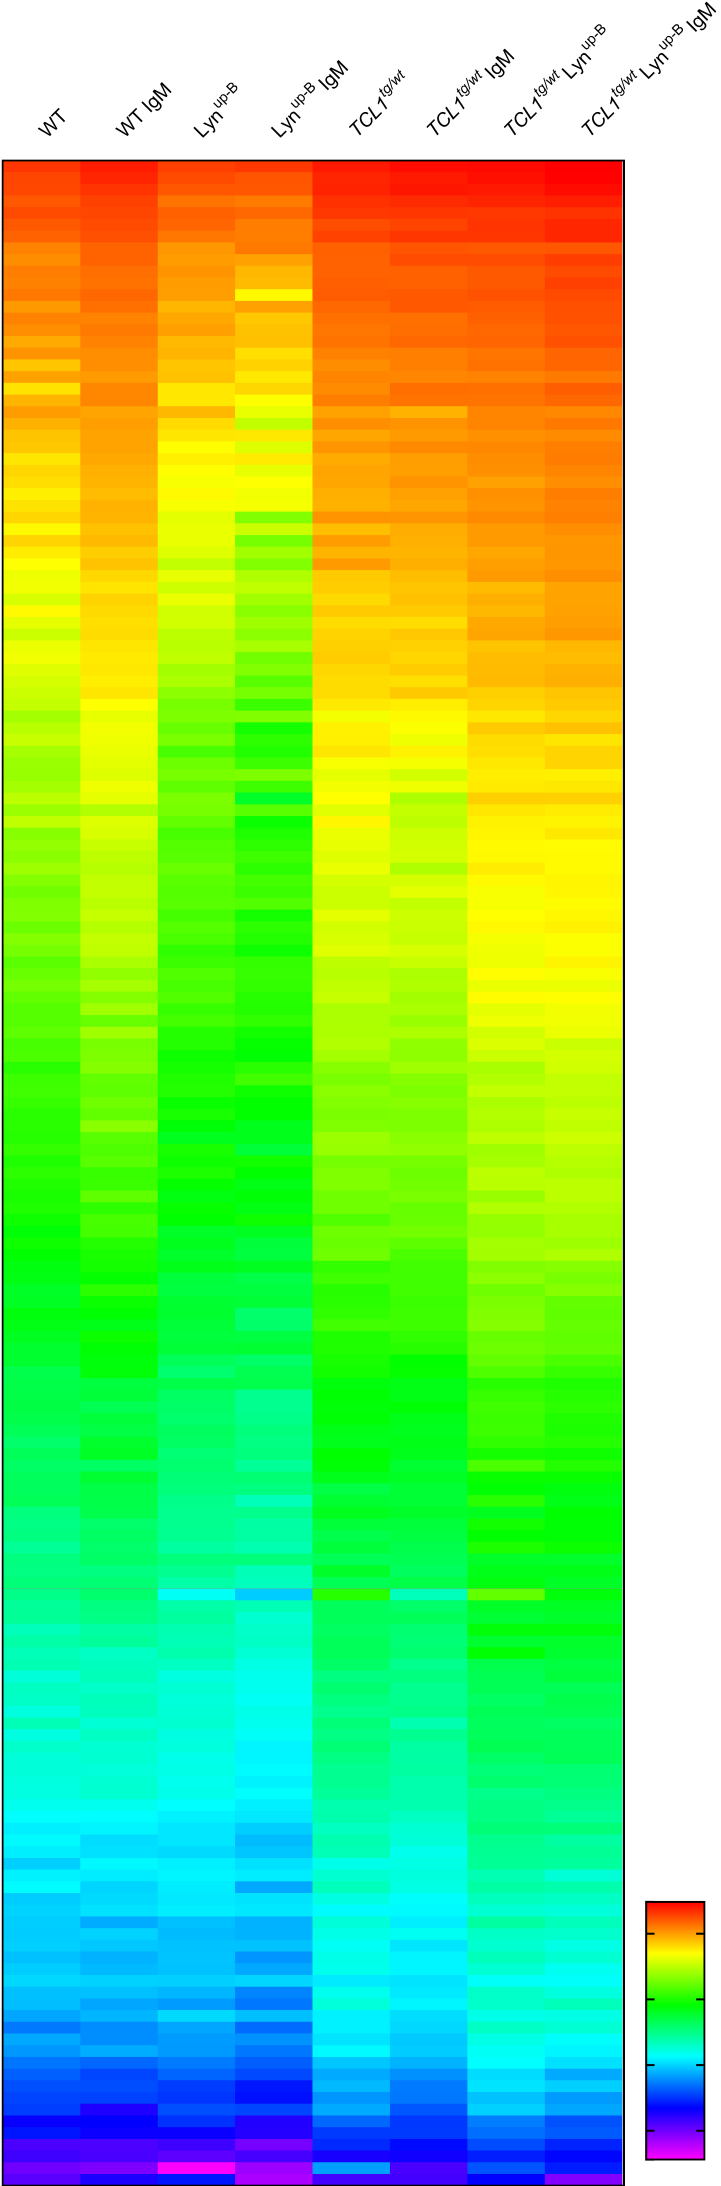

## Supplemental Figure Legends

### Figure S1

(A) Tyrosine phosphorylation of purified splenic B cells from WT, *Lyn<sup>up-B</sup>*, *TCL1<sup>tg/wt</sup>* and *TCL1<sup>tg/wt</sup> Lyn<sup>up-B</sup>* mice left untreated or stimulated with 20 µg/ml IgM for 10 minutes. Means of 3 animals per genotype are shown. Measured peptides are indicated on the left.

(B) Log Fold Changes (LFCs) of tyrosine phosphorylation upon IgM stimulation of WT and *Lyn<sup>up-B</sup>* B cells. Measured peptides are indicated on the left. Related to Figure 1D.

(C) LFCs of tyrosine phosphorylation upon IgM stimulation of *TCL1<sup>tg/wt</sup>* and *TCL1<sup>tg/wt</sup> Lyn<sup>up-B</sup>* B cells. Measured peptides are indicated on the left. Related to Figure 4F.

(D) Western Blot of splenic B cells from WT and *Lyn<sup>up-B</sup>* mice, which were treated with 20 µg/ml IgM for 10 minutes or left untreated. Staining of pShip1, pSyk and β-Actin are shown.

### Figure S2

(A) Flow cytometric analysis of CD3<sup>+</sup> T cells in the peripheral blood of WT and *Lyn<sup>up-B</sup>* mice over 1 year. Lines represent medians.

(B) Percentage of monocytes per PBMC in the peripheral blood of WT and *Lyn<sup>up-B</sup>* mice over 1 year time period. Lines represent medians.

(C) Count of erythrocytes per µl blood of WT and *Lyn<sup>up-B</sup>* mice over 1 year time period.

(D) Flow cytometric analysis of CD3<sup>+</sup> T cells in spleens of young (<6 months) and old (>6 months) WT and *Lyn<sup>up-B</sup>* mice. Lines represent medians.

(E) Flow cytometric analysis of CD11b<sup>+</sup> cells in spleens of young (<6 months) and old (>6 months) WT and *Lyn<sup>up-B</sup>* mice. Lines represent medians.

(F) Autoantibody test from serum of 4 WT and 4 *Lyn<sup>up-B</sup>* mice. Mice were 2-4 month old. Serum of the mice was diluted 1:100. In principle, autoantibodies in the serum bind to antigens in human epithelial HEp-2 cells on a slide. A fluorescent secondary antibody served as a marker for an antigen-antibody binding. Tests were counted as positive when a bright fluorescent signal in the nucleus was observed. Accordingly, two *Lyn<sup>up-B</sup>* samples were classified as positive and one WT mouse was classified as slight positive.

### Figure S3

(A) Western Blot of splenic B cell pools of two animals per genotype of *TCL1<sup>tg/wt</sup>* and *TCL1<sup>tg/wt</sup> Lyn<sup>up-B</sup>* mice, which were treated with 20 µg/ml IgM initially, after 10 min and after 20 min. IgM incubation was stopped after 3 min, 15 min and 30 min. pShip1, pSyk and Gapdh staining are shown.

(B) Western Blot of isolated splenic B cells from *TCL1<sup>tg/wt</sup>* and *TCL1<sup>tg/wt</sup> Lyn<sup>up-B</sup>* mice, which were left untreated or stimulated with 20 µg/ml IgM for 3 minutes. Staining of pShip1, pSyk and Gapdh are shown.

(C) Phosphotyrosine staining of a Western Blot of isolated splenic B cells from *TCL1<sup>tg/wt</sup>* and *TCL1<sup>tg/wt</sup> Lyn<sup>up-B</sup>* mice, untreated or stimulated with 20 µg/ml IgM for 10 minutes.

### Figure S4

Dephosphorylated peptides in purified splenic B cells from WT, *Lyn<sup>up-B</sup>*, *TCL1<sup>tg/wt</sup>* and *TCL1<sup>tg/wt</sup> Lyn<sup>up-B</sup>* mice left untreated or stimulated with 20 µg/ml IgM for 10 minutes. Means of 2 animals per genotype are shown. Dephosphorylated peptide names are property of PamGene and have to be kept confidential.
